# Supplementary material for: Stoichiometric variation in two molecular salts of the anti-tuberculosis drug isoniazid with 2-butynoic acid
Source: Royal Society of Chemistry journal article supplement (doi:10.1039/c2ce25101a), 2012-01-01
Supplement: c2ce25101a.pdf [file c2ce25101a.pdf]

### PXRD confirming bulk quantification.

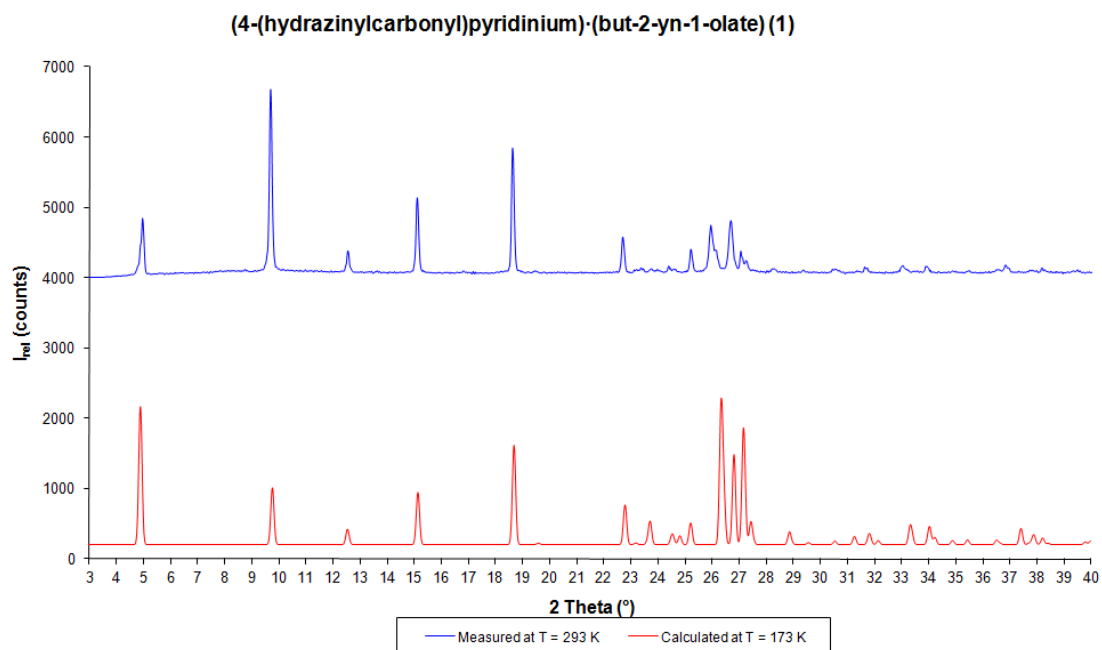

**Figure S1.** Comparative calculated and measured PXRD pattern for **1**.

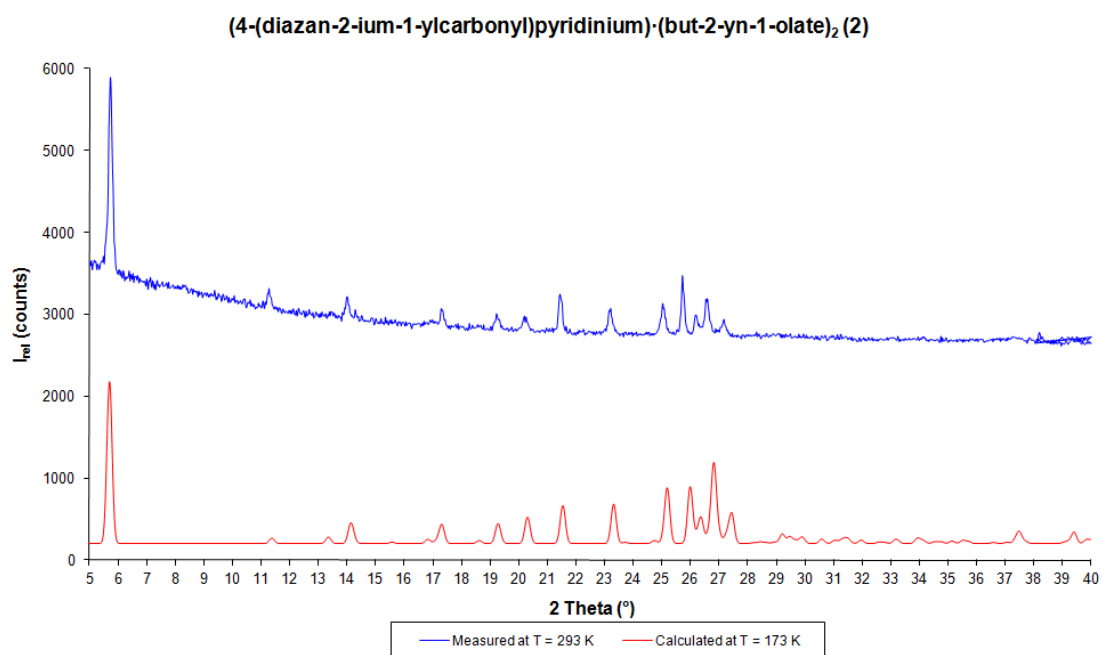

**Figure S2.** Comparative calculated and measured PXRD pattern for **2**.

## Differential Scanning Calorimetry

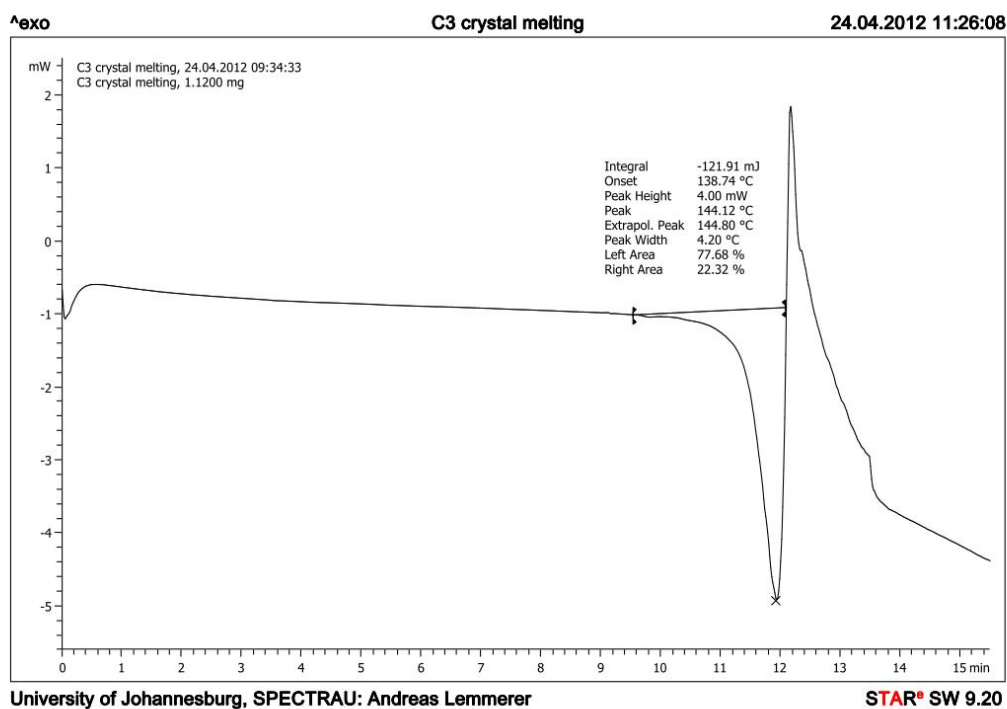

Figure S3. DSC trace for salt 1.

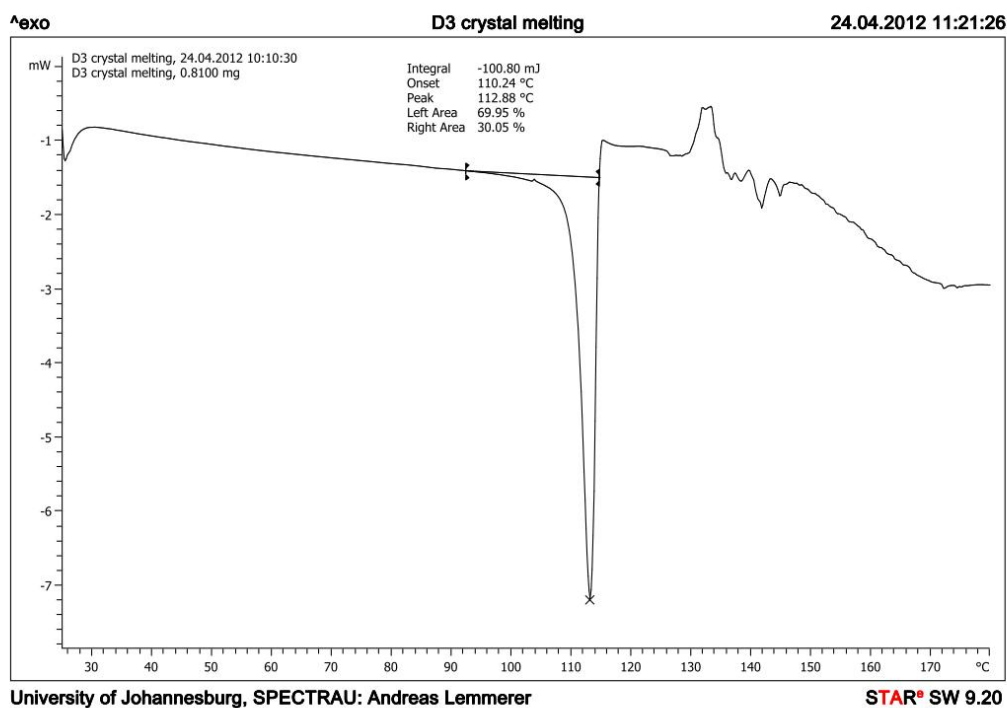

Figure S4. DSC trace for salt 2.
